# Supplementary material for: Metabolic Responses and Resilience to Environmental Challenges in the Sedentary Batrachoid Halobatrachus didactylus (Bloch & Schneider, 1801)
Source: MDPI journal article supplement (doi:10.3390/ani13040632), 2023-02-11
Supplement: s1 [file s1]

## Supplementary Materials:

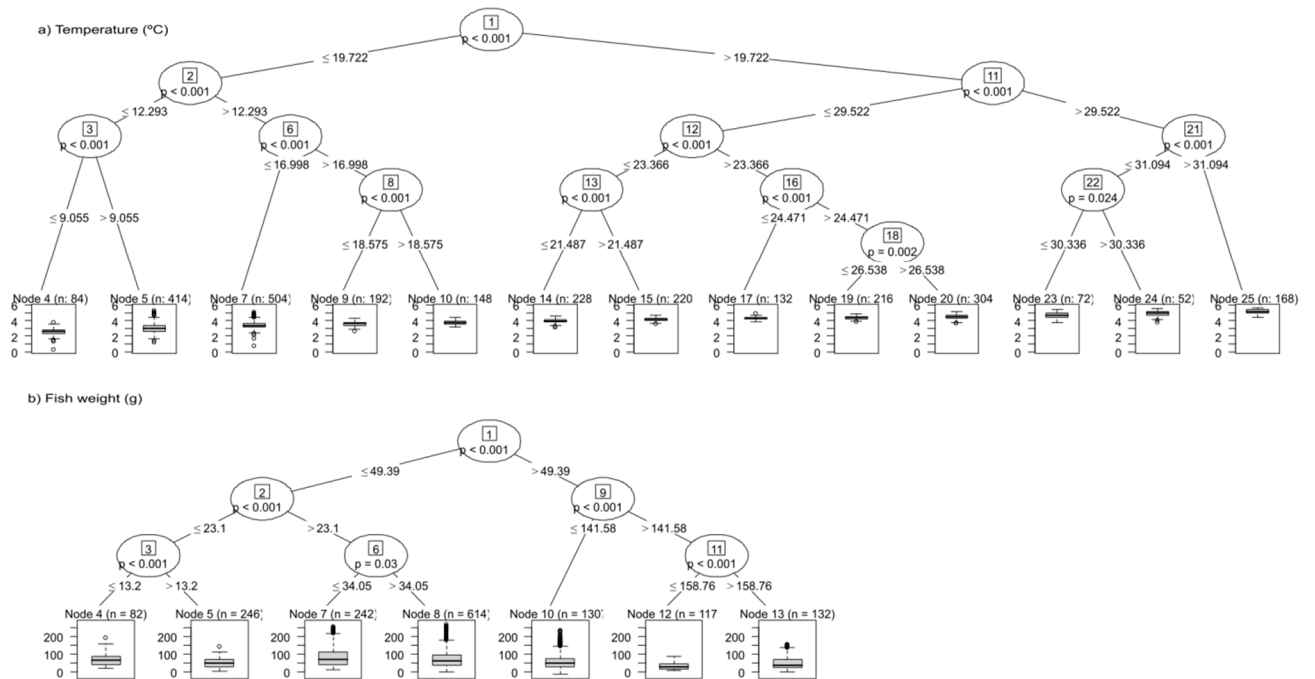

**Figure S1.** Regression tree analysis applied to a) temperature ramp and b) weight data of *Halobatrachus didactylus*. Separation nodes (bubbles) present the p of the statistical test, between the ranges (numbers on the connections). End nodes present total data points and their distribution on an individual boxplot.

**Table S1.** Standard metabolic rates (SMR) of several sedentary fish. SMR at 15 °C was calculated using the suggested Q10 of 1.8 [46]).

| Species                         | SMR<br>(mgO <sub>2</sub> Kg <sup>-1</sup><br>L <sup>-1</sup> ) | Weight<br>(g) | Temperature<br>(°C) | SMR at 15 °C<br>(mgO <sub>2</sub> Kg <sup>-1</sup><br>L <sup>-1</sup> ) | Order             | Study                            |
|---------------------------------|----------------------------------------------------------------|---------------|---------------------|-------------------------------------------------------------------------|-------------------|----------------------------------|
| <i>Opsanus tau</i>              | 27.48                                                          | 214-612       | 22                  | 18.2                                                                    | Batrachoidiformes | Ultsch et al., 1981 [18]         |
| <i>Opsanus tau</i>              | 35                                                             | 310-437       | 21                  | 24.5                                                                    | Batrachoidiformes | Amorim et al 2001 [61]           |
| <i>Opsanus beta</i>             | 96                                                             | 50-230        | 25                  | 53.3                                                                    | Batrachoidiformes | Gilmour et al 1998 [60]          |
| <i>Notothenia neglecta</i>      | 26                                                             | 22-63         | 0                   | 62.8                                                                    | Perciformes       | Johnston et al., 1991 [119]      |
| <i>Agonus cataphractus</i>      | 42                                                             | 43-313        | 4                   | 80.2                                                                    | Scorpaeniformes   | Johnston et al., 1991 [119]      |
| <i>Oligocottus maculosus</i>    | 39.4                                                           | 1.56-1.78     | 12.2                | 46.4                                                                    | Scorpaeniformes   | Sloman et al 2008 [120]          |
| <i>Bellapiscis medius</i>       | 160                                                            | 6.05-6.33     | 15                  | 160                                                                     | Blenniformes      | Hilton et al., 2008 [118]        |
| <i>Bellapiscis lesleyae</i>     | 180                                                            | 2.99-4.21     | 15                  | 180                                                                     | Blenniformes      | Hilton et al., 2008 [118]        |
| <i>Myoxocephalus scorpius</i>   | 48                                                             | 27-164        | 7                   | 76.8                                                                    | Scorpaeniformes   | Johnston et al., 1991 [119]      |
| <i>Paracirrhites arcatus</i>    | 68                                                             | 13-36         | 24                  | 40.1                                                                    | Perciformes       | Johnston et al., 1991 [119]      |
| <i>Synanceia verrucosa</i>      | 24                                                             | 177           | 25                  | 13.3                                                                    | Scorpaeniformes   | Kunzmann 2021 [66]               |
| <i>Scorpaenidae gen. sp</i>     | 32.3                                                           | 18-82         | 25                  | 17.9                                                                    | Scorpaeniformes   | Zimmerman and Kunzman 2001 [44]  |
| <i>Tautoglabrus adspersus</i>   | 20.2                                                           | 87.3-100.1    | 6.2                 | 33.9                                                                    | Labriformes       | Speers-Roesch et al., 2018 [121] |
| <i>Halobatrachus didactylus</i> | 16.3                                                           | 14-148        | 15                  | 16.3                                                                    | Batrachoidiformes | This study                       |
